# Supplementary material for: Fabrication of an ion-enhanced low-temperature tolerant graphene/PAA/KCl hydrogel and its application for skin sensors
Source: Royal Society of Chemistry journal article supplement (doi:10.1039/d2nr04803e), 2023-01-01
Supplement: d2nr04803e1.pdf [file d2nr04803e1.pdf]

**Fabrication of Ion-enhanced Low-temperature tolerant  
graphene/PAA/KCl Hydrogel and its Application for Skin Sensors**

Yaoyao Wang<sup>a,b</sup>, Longhang Zhu<sup>a,b</sup>, Haimei Lu<sup>a,b</sup>, Xiangyu Kong<sup>a</sup>, Chao Wang<sup>a,\*</sup>, Yong Huang<sup>a</sup>, Min Wu<sup>a,\*</sup>

<sup>a</sup>Technical Institute of Physics and Chemistry, Chinese Academy of Sciences, 29 Zhongguancun East Road, Haidian District, Beijing 100190, China.

<sup>b</sup>Center of Materials Science and Optoelectronics Engineering, University of the Chinese Academy of Sciences, 19 A Yuquan Rd, Shijingshan District, Beijing, 100049, China.

**Corresponding Authors**

\*E-mail: [wumin@mail.ipc.ac.cn](mailto:wumin@mail.ipc.ac.cn) (Min Wu)

\*E-mail: [chwangipc@mail.ipc.ac.cn](mailto:chwangipc@mail.ipc.ac.cn) (Chao Wang)

## Tables & Figures

**Table S1.** The composition of GO<sub>n</sub>/PAA-Fe<sub>m</sub> hydrogels.

| Hydrogels                                  | GO<br>(wt%) | FeSO <sub>4</sub> ·<br>7H <sub>2</sub> O<br>(wt%) | H <sub>2</sub> O <sub>2</sub><br>(mol%) | H <sub>2</sub> SO <sub>4</sub><br>(mol%) | AA<br>(wt%) | MBA<br>(wt%) | Water<br>(mL) |
|--------------------------------------------|-------------|---------------------------------------------------|-----------------------------------------|------------------------------------------|-------------|--------------|---------------|
| PAA                                        | 0           | 1                                                 | 0.029                                   | 0.016                                    | 100         | 0.003        | 30            |
| GO <sub>n</sub> /PAA-<br>Fe <sub>1</sub>   | 0.3         | 1                                                 | 0.029                                   | 0.016                                    | 100         | 0.003        | 30            |
|                                            | 0.4         | 1                                                 | 0.029                                   | 0.016                                    | 100         | 0.003        | 30            |
|                                            | 0.5         | 1                                                 | 0.029                                   | 0.016                                    | 100         | 0.003        | 30            |
|                                            | 0.6         | 1                                                 | 0.029                                   | 0.016                                    | 100         | 0.003        | 30            |
| GO <sub>0.5</sub> /PAA<br>-Fe <sub>m</sub> | 0.5         | 0.00                                              | 0.029                                   | 0.016                                    | 100         | 0.003        | 30            |
|                                            | 0.5         | 0.50                                              | 0.029                                   | 0.016                                    | 100         | 0.003        | 30            |
|                                            | 0.5         | 0.75                                              | 0.029                                   | 0.016                                    | 100         | 0.003        | 30            |
|                                            | 0.5         | 1.00                                              | 0.029                                   | 0.016                                    | 100         | 0.003        | 30            |
|                                            | 0.5         | 1.25                                              | 0.029                                   | 0.016                                    | 100         | 0.003        | 30            |
|                                            | 0.5         | 1.50                                              | 0.029                                   | 0.016                                    | 100         | 0.003        | 30            |

**Notes:** n presents the mass percentage of GO relative to acrylic acid, m presents the mass percentage of FeSO<sub>4</sub>·7H<sub>2</sub>O relative to acrylic acid.

**Table S2.** The volume of GO/PAA/KCl<sub>t-c</sub> hydrogels.

| Hydrogels                              | Diameter (mm) | Height (mm) | Volume (cm <sup>3</sup> ) |
|----------------------------------------|---------------|-------------|---------------------------|
| GO <sub>0.5</sub> /PAA-Fe <sub>1</sub> | 57            | 5.28        | 13.47                     |
| GO/PAA/KCl <sub>12-5</sub>             | 60            | 5.41        | 15.29                     |
| GO/PAA/KCl <sub>12-10</sub>            | 58            | 5.35        | 14.13                     |
| GO/PAA/KCl <sub>12-15</sub>            | 57            | 5.3         | 13.52                     |
| GO/PAA/KCl <sub>12-20</sub>            | 55            | 4.83        | 11.47                     |
| GO/PAA/KCl <sub>4-20</sub>             | 57            | 5.21        | 13.29                     |
| GO/PAA/KCl <sub>8-20</sub>             | 56            | 5.02        | 12.36                     |
| GO/PAA/KCl <sub>16-20</sub>            | 58            | 5.3         | 14.00                     |

**Table S3.** The properties comparison with other anti-freezing hydrogels.

| Stress (MPa) | Strain (%) | Ionic conductivity (S/m)     | GF (at 25°C) | references        |
|--------------|------------|------------------------------|--------------|-------------------|
| 0.06         | 800        | 0.035 (25°C)                 | 3.2          | [1]               |
| 0.151        | 474        | - -                          | - -          | [2]               |
| 0.43         | 780        | - -                          | 2.69         | [3]               |
| 0.17         | 4500       | 0.001 (25°C)                 | 8.5          | [4]               |
| 1.5          | 1769       | - -                          | 7.79         | [5]               |
| 0.14         | 43         | 7.49 (25°C)                  | - -          | [6]               |
| 0.168        | 1465       | 7.53 (-21°C)                 | - -          | [7]               |
| 0.47         | 180        | - -                          | - -          | [8]               |
| 0.36         | 480        | 1 (25°C)<br>0.92 (-20°C)     | 2.84         | [9]               |
| 0.0465       | 600        | 4.24 (25°C);<br>1.16 (-50°C) | 2.173        | [10]              |
| 0.37         | 1758       | 4.1 (-31.7°C)                | 1.744        | [11]              |
| 2.65         | 1511       | 24.4 (25°C)<br>16.2 (-20°C)  | 8.66         | <i>This study</i> |

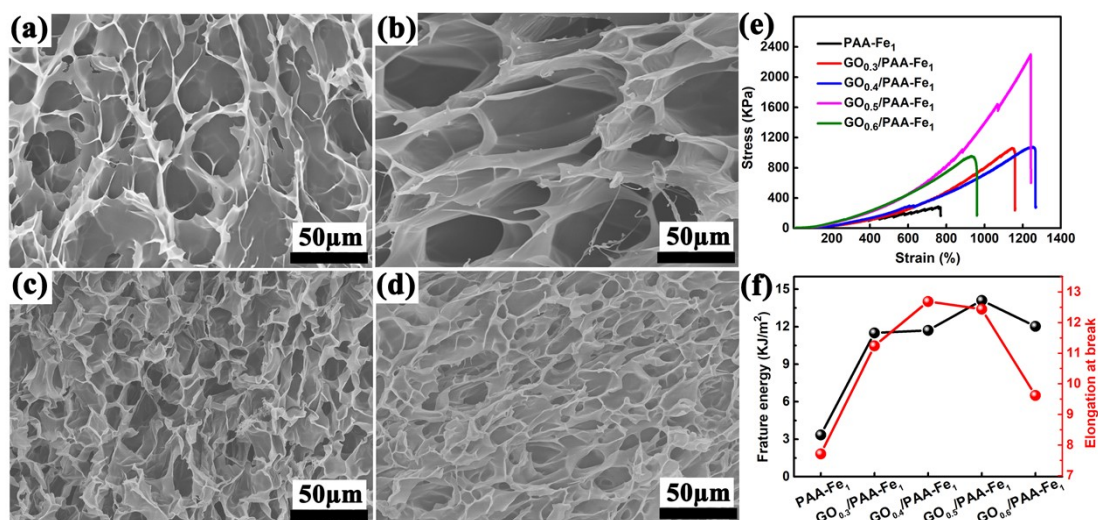

**Figure S1.** SEM images of  $GO_n/PAA-Fe_1$  aerogels with different content of GO. (a)  $GO_{0.3}/PAA-Fe_1$ , (b)  $GO_{0.4}/PAA-Fe_1$ , (c)  $GO_{0.5}/PAA-Fe_1$  and (d)  $GO_{0.6}/PAA-Fe_1$  aerogels. The mechanical performance of  $GO_n/PAA-Fe_1$  hydrogels. (e) Tensile stress-strain curves and (f) the fracture toughness and extension ratio under different content of GO.

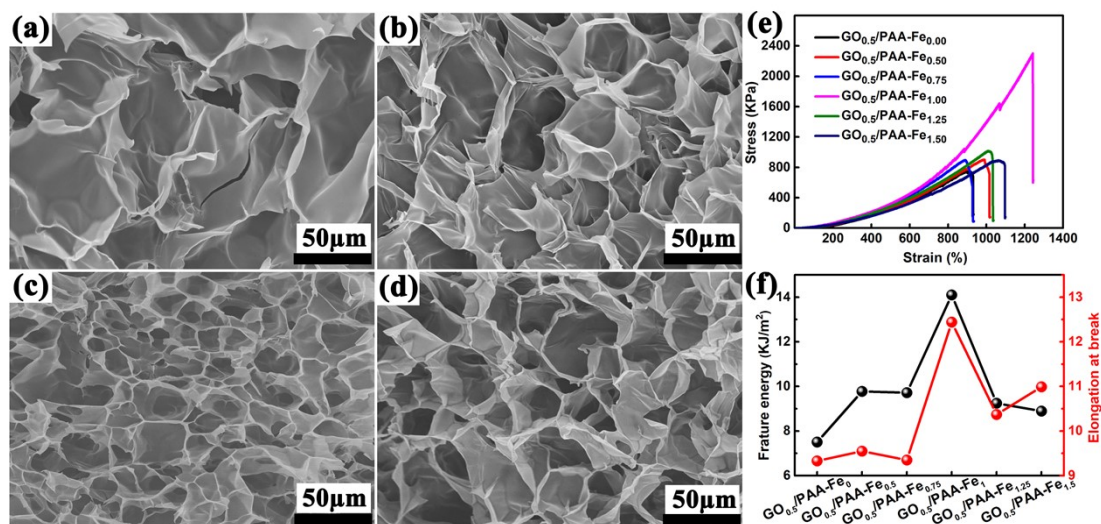

**Figure S2.** SEM images of  $GO_{0.5}/PAA-Fe_m$  aerogels with different content of  $FeSO_4 \cdot 7H_2O$ . (a)  $GO_{0.5}/PAA-Fe_{0.5}$ , (b)  $GO_{0.5}/PAA-Fe_{0.75}$ , (c)  $GO_{0.5}/PAA-Fe_{1.25}$  and (d)  $GO_{0.5}/PAA-Fe_{1.5}$  aerogels. The mechanical performance of  $GO_{0.5}/PAA-Fe_m$  hydrogels. (e) Tensile stress-strain curves and (f) the fracture toughness and extension ratio under different content of  $FeSO_4 \cdot 7H_2O$ .

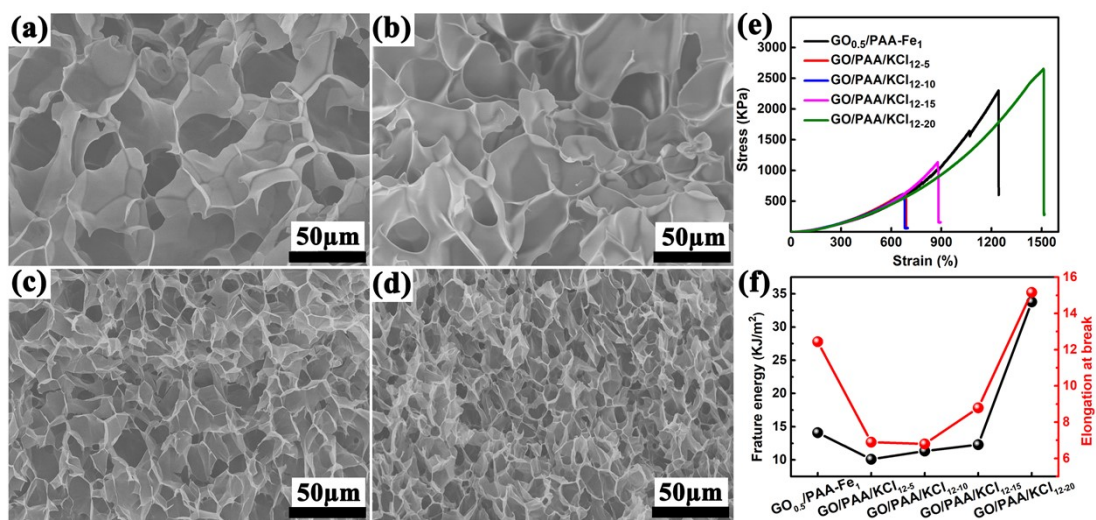

**Figure S3.** SEM images of GO/PAA/KCl<sub>12-c</sub> aerogels. (a) GO/PAA/KCl<sub>12-5</sub>, (b) GO/PAA/KCl<sub>12-10</sub>, (c)GO/PAA/KCl<sub>12-15</sub> and (d) GO/PAA/KCl<sub>12-20</sub> aerogels. (e) Tensile stress-strain curves and (f) the fracture toughness and extension ratio of various K<sup>+</sup>-contained hydrogels .

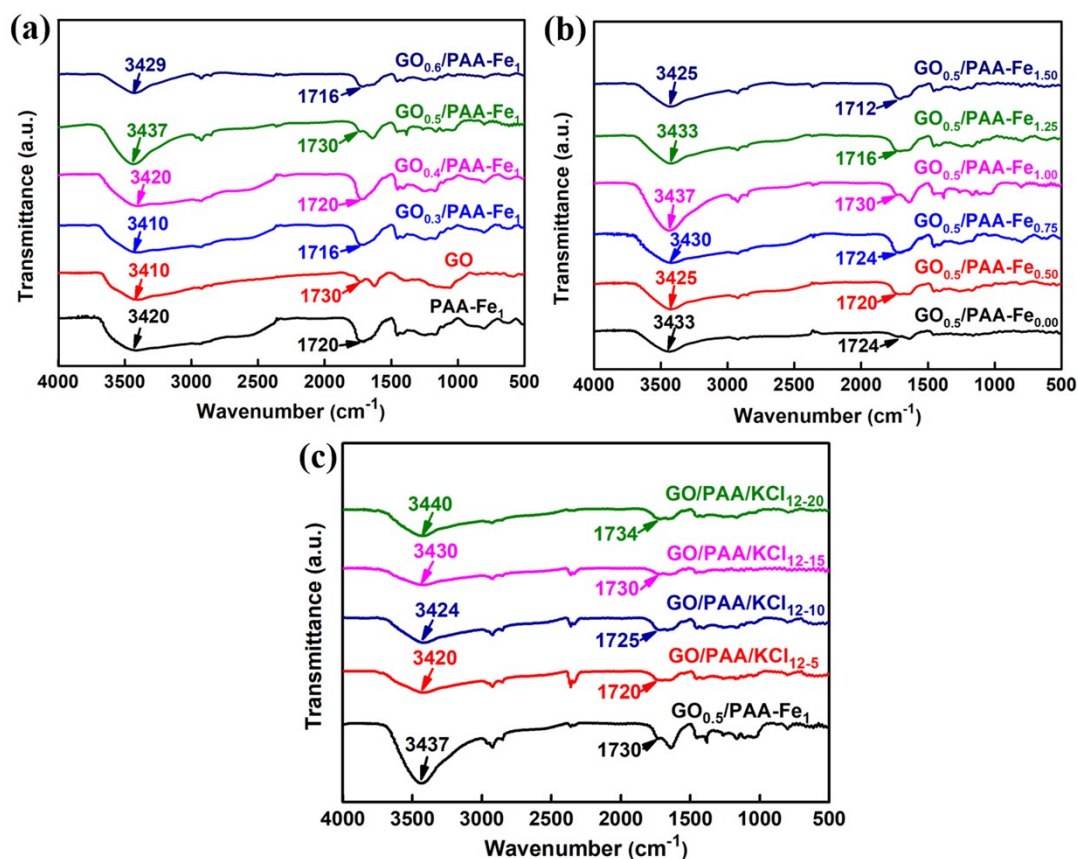

**Figure S4.** FT-IR spectra of GO<sub>n</sub>/PAA-Fe<sub>m</sub> and GO/PAA/KCl aerogels. (a) FT-IR spectra of GO<sub>n</sub>/PAA-Fe<sub>1</sub> aerogels with different content of GO, (b) FT-IR spectra of GO<sub>0.5</sub>/PAA-Fe<sub>m</sub> aerogels with different content of FeSO<sub>4</sub>·7H<sub>2</sub>O, (c) FT-IR spectra of GO/PAA/KCl<sub>12-c</sub> hydrogels.

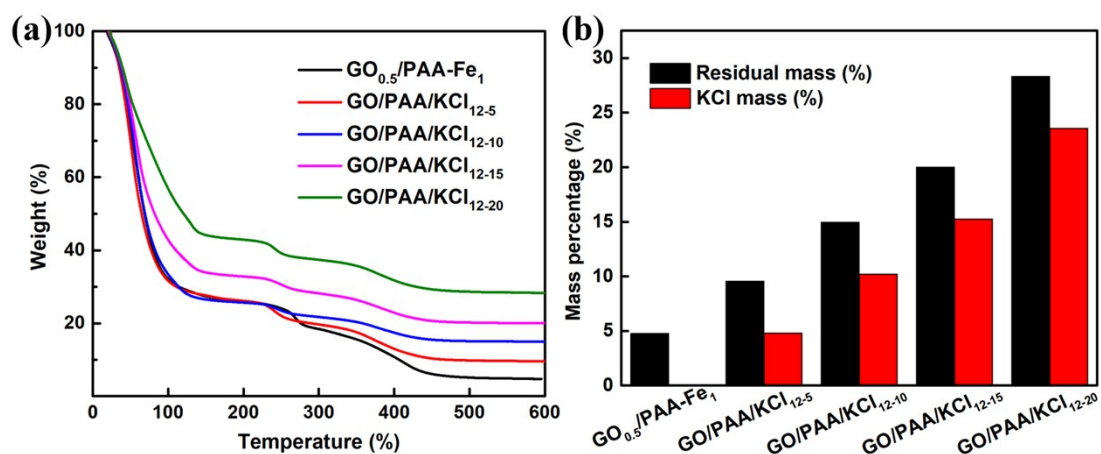

**Figure S5.** (a) The TGA curves and (b) the KCl content in GO/PAA/KCl<sub>12-c</sub> hydrogels.

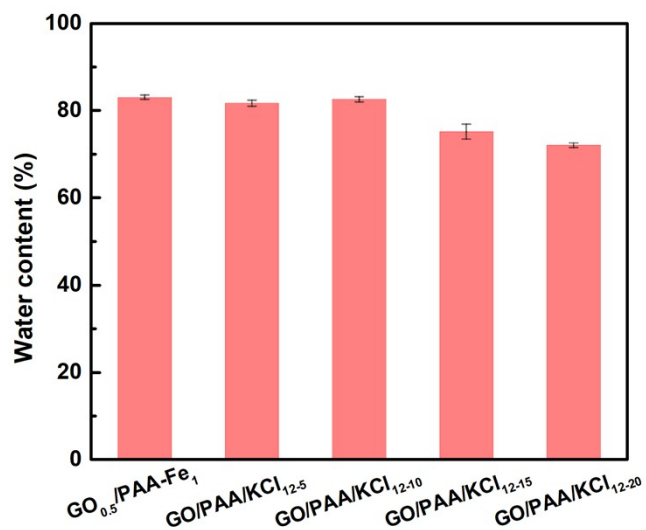

**Figure S6.** The water content of the GO/PAA/KCl<sub>12-c</sub> hydrogel.

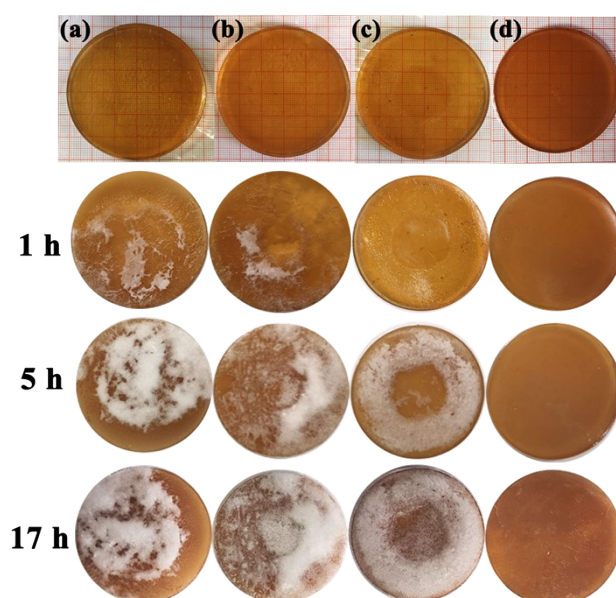

**Figure S7.** The appearance figures of hydrogels which soaked in different concentrations of KCl solutions for 12 h and then frozen at -20 °C for different times. (a) GO/PAA/KCl<sub>12-5</sub>, (b) GO/PAA/KCl<sub>12-10</sub>, (c) GO/PAA/KCl<sub>12-15</sub> and (d) GO/PAA/KCl<sub>12-20</sub> hydrogels.



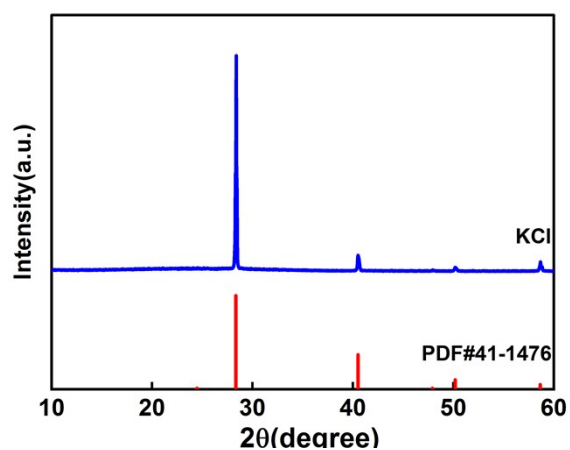

**Figure S8.** XRD patterns of KCl crystals isolated from the surface frost .

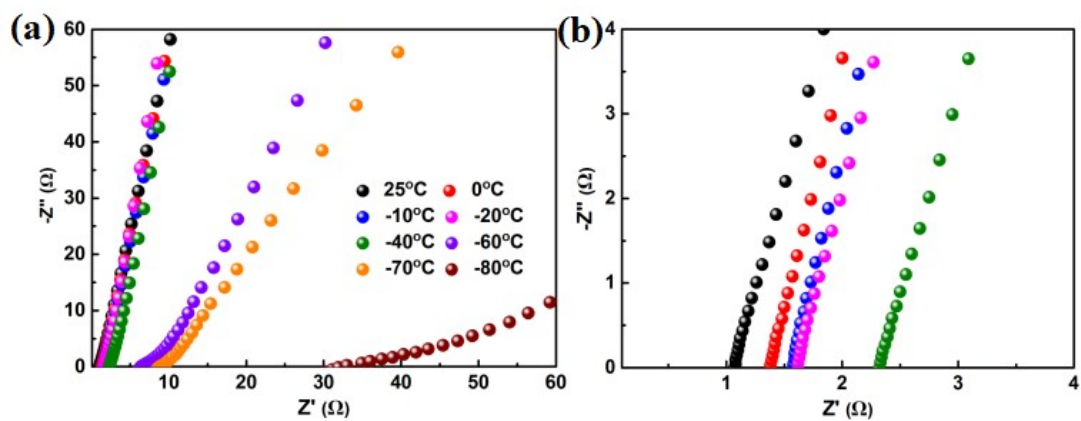

**Figure S9.** Electrochemical impedance spectroscopy (EIS) of GO/PAA/KCl<sub>12-20</sub> hydrogel at various temperatures. (b) is the magnification image of (a).

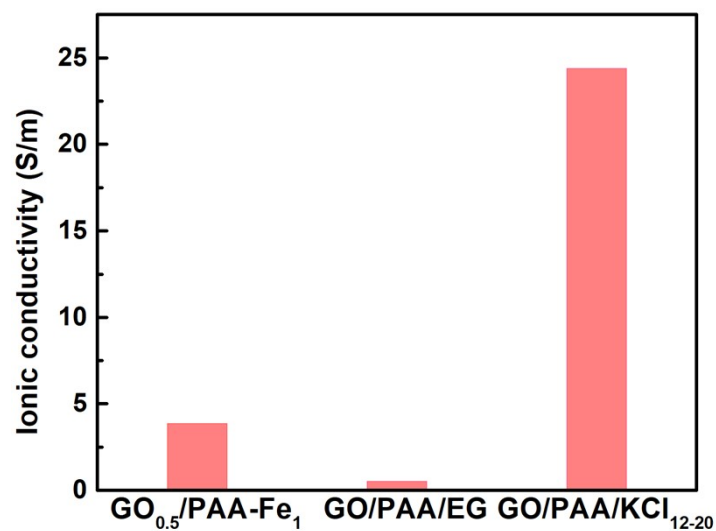

**Figure S10.** The ionic conductivity of various hydrogels at room temperature.

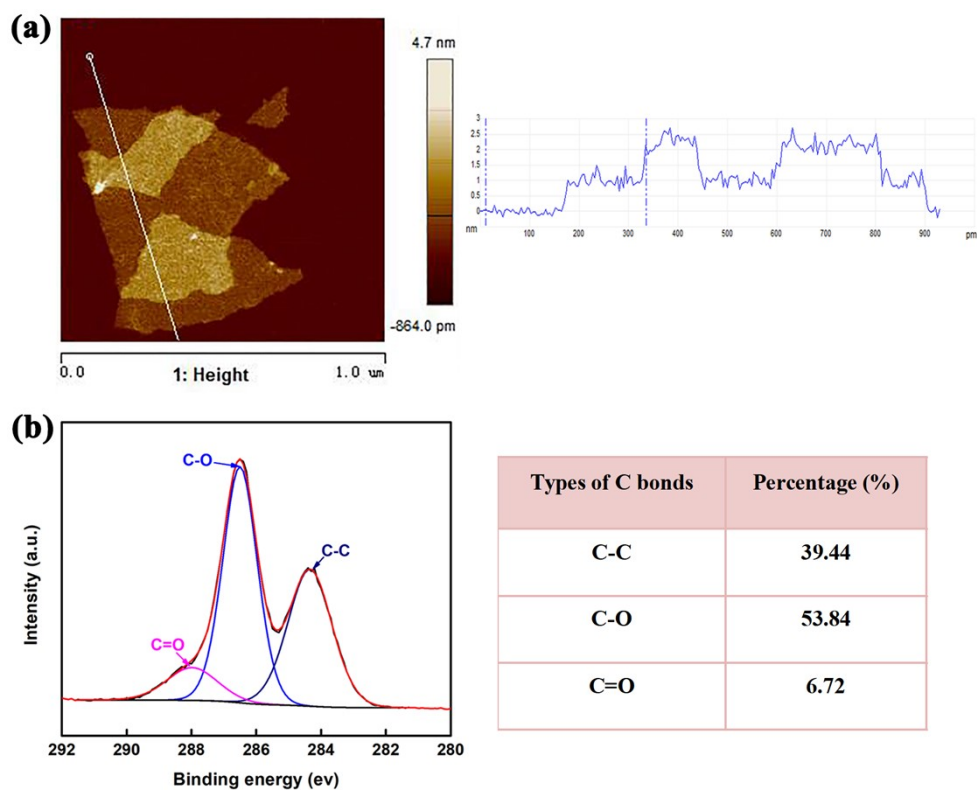

**Figure S11.** (a) The morphology characterization of GO by AFM. (b) XPS C1s spectra of GO and the percentage of different types C chemical bond.

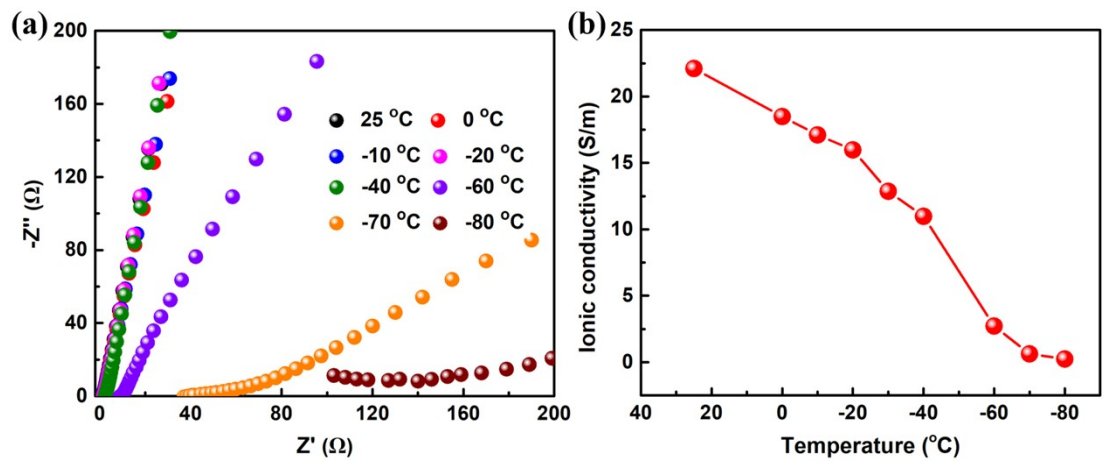

**Figure S12.** (a) Electrochemical impedance spectroscopy and (b) ionic conductivity of PAA/KCl<sub>12-20</sub> hydrogel at various temperatures.

## References

- [1] L. Wu, L. Li, M. Qu, H. Wang, Y. Bin, Mussel-Inspired Self-Adhesive, Antidrying, and Antifreezing Poly(acrylic acid)/Bentonite/Polydopamine Hybrid Glycerol-Hydrogel and the Sensing Application, *ACS Applied Polymer Materials*, 2 (2020) 3094-3106.
- [2] Y.W. Shishan Xue, Meiling Guo, Yuanmeng Xia, Dan Liu, Hongwei Zhou and Weiwei Lei, Self-healable poly(acrylic acid-co-maleic acid)-glycerol-boron nitride nanosheet composite hydrogels at low temperature with enhanced mechanical properties and water retention, *Soft Matter*, 15 (2019) 3680-3688.
- [3] X. Jing, P. Feng, Z. Chen, Z. Xie, H. Li, X.-F. Peng, H.-Y. Mi, Y. Liu, Highly Stretchable, Self-Healable, Freezing-Tolerant, and Transparent Polyacrylic Acid/Nanochitin Composite Hydrogel for Self-Powered Multifunctional Sensors, *ACS Sustainable Chemistry & Engineering*, 9 (2021) 9209-9220.
- [4] H. Sun, Y. Zhao, S. Jiao, C. Wang, Y. Jia, K. Dai, G. Zheng, C. Liu, P. Wan, C. Shen, Environment Tolerant Conductive Nanocomposite Organohydrogels as Flexible Strain Sensors and Power Sources for Sustainable Electronics, *Advanced Functional Materials*, 31 (2021) 2101696.
- [5] Q. Yu, Z. Qin, F. Ji, S. Chen, S. Luo, M. Yao, X. Wu, W. Liu, X. Sun, H. Zhang, Y. Zhao, F. Yao, J. Li, Low-temperature tolerant strain sensors based on triple crosslinked organohydrogels with ultrastretchability, *Chemical Engineering Journal*, 404 (2021) 126559.
- [6] X.F. Zhang, X. Ma, T. Hou, K. Guo, J. Yin, Z. Wang, L. Shu, M. He, J. Yao, Inorganic Salts Induce Thermally Reversible and Anti-Freezing Cellulose Hydrogels, *Angew Chem Int Ed Engl*, 58 (2019) 7366-7370.
- [7] L. Guan, S. Yan, X. Liu, X. Li, G. Gao, Wearable strain sensors based on casein-driven tough, adhesive and anti-freezing hydrogels for monitoring human-motion, *J Mater Chem B*, 7 (2019) 5230-5236.
- [8] L.X. Wenhui Zheng, Yangyang Li, Yudong Huang, Bing Li, Zaixing Jiang, Guolin Gao, Anti-freezing, moisturizing, resilient and conductive organohydrogel for sensitive pressure sensors, *Journal of Colloid and Interface Science*, 594 (2021) 584-592.
- [9] J. Wen, J. Tang, H. Ning, N. Hu, Y. Zhu, Y. Gong, C. Xu, Q. Zhao, X. Jiang, X. Hu, L. Lei, D. Wu, T. Huang, Multifunctional Ionic Skin with Sensing, UV-Filtering, Water-Retaining, and Anti-Freezing Capabilities, *Advanced Functional Materials*, 31 (2021) 2011176.
- [10] T.Z. Chi Jiang, Huichao Liu, Guang Yang, Zhipeng He, Minjie Wang, Muwei Ji, Guangtao Cong, Jiali Yu, Caizhen Zhu and Jian Xu, A one-step aqueous route to prepare polyacrylonitrile-based hydrogels with excellent ionic conductivity and extreme low temperature tolerance, *Journal of Materials Chemistry A*, 8 (2020) 22090–22099.
- [11] L.K.a.G.G. Xinyao Li, A bio-inspired self-recoverable polyampholyte hydrogel with low temperature sensing, *Journal of Materials Chemistry B*, 9 (2021) 2010- 2015.
